# Supplementary material for: Senescence marker activin A is increased in human diabetic kidney disease: association with kidney function and potential implications for therapy
Source: PubMed Central journal article supplement — BMJ Open Diabetes Res Care. 2019 Dec 15;7(1):e000720. doi: 10.1136/bmjdrc-2019-000720 (PMC6936543; doi:10.1136/bmjdrc-2019-000720), 2019-12-15
Supplement: bmjdrc-2019-000720supp001.pdf [file bmjdrc-2019-000720supp001.pdf]

**Supplemental Table 1. Spearman correlations of activin A with participant characteristics and kidney injury biomarkers**

| Activin A correlations                                    | Mayo Diabetes Cohort<br>(n=46)           |                   | Galway Diabetes Cohort<br>(n=160)        |               | Overall Cohort<br>(n=206)                |                   |
|-----------------------------------------------------------|------------------------------------------|-------------------|------------------------------------------|---------------|------------------------------------------|-------------------|
|                                                           | Spearman's<br>Correlation<br>coefficient | p-value           | Spearman's<br>Correlation<br>coefficient | p-value       | Spearman's<br>Correlation<br>coefficient | p-value           |
| <b>Estimated GFR calculations</b>                         |                                          |                   |                                          |               |                                          |                   |
| <b>CKD-EPI eGFR, per ml/min/1.73m<sup>2</sup></b>         | -0.421                                   | <b>0.004</b>      | -0.600                                   | <b>0.001</b>  | -0.608                                   | <b>&lt;0.0001</b> |
| <b>MDRD eGFR, per ml/min/1.73m<sup>2</sup></b>            | -0.416                                   | <b>0.004</b>      | -0.586                                   | <b>0.001</b>  | -0.595                                   | <b>&lt;0.0001</b> |
| Cystatin C eGFR, per ml/min/BSA                           | -0.471                                   | <b>0.001</b>      | -                                        | -             | -                                        | -                 |
| <b>Clinical features and laboratory measurements</b>      |                                          |                   |                                          |               |                                          |                   |
| Age, per year                                             | -0.057                                   | 0.7               | 0.348                                    | <b>0.001</b>  | 0.281                                    | <b>&lt;0.0001</b> |
| BMI, per kg/m <sup>2</sup>                                | 0.227                                    | 0.1               | 0.166                                    | <b>0.04</b>   | 0.218                                    | <b>0.002</b>      |
| <b>Hemoglobin</b> , per g/L                               | -0.472                                   | <b>0.001</b>      | -0.390                                   | <b>0.001</b>  | -0.399                                   | <b>&lt;0.0001</b> |
| Hemoglobin A <sub>1c</sub> , per %                        | 0.101                                    | 0.5               | 0.077                                    | 0.3           | 0.094                                    | 0.2               |
| Sodium, per mmol/L                                        | 0.306                                    | <b>0.04</b>       | 0.040                                    | 0.6           | 0.137                                    | <b>0.049</b>      |
| Potassium, per mmol/L                                     | 0.031                                    | 0.8               | 0.289                                    | <b>0.0002</b> | 0.280                                    | <b>&lt;0.0001</b> |
| Phosphorus, per mg/dL                                     | 0.105                                    | 0.5               | 0.194                                    | <b>0.01</b>   | 0.260                                    | <b>0.0002</b>     |
| <b>Albumin</b> , per g/dL                                 | -0.501                                   | <b>0.0004</b>     | -0.392                                   | <b>0.001</b>  | -0.473                                   | <b>&lt;0.0001</b> |
| <b>BUN</b> , per mg/dL                                    | 0.318                                    | <b>0.03</b>       | 0.522                                    | <b>0.001</b>  | 0.524                                    | <b>&lt;0.0001</b> |
| <b>PTH</b> , per pg/mL                                    | 0.385                                    | <b>0.008</b>      | 0.462                                    | <b>0.001</b>  | 0.526                                    | <b>&lt;0.0001</b> |
| <b>UACR</b> , per mg/g                                    | 0.541                                    | <b>0.0002</b>     | 0.442                                    | <b>0.001</b>  | 0.479                                    | <b>&lt;0.0001</b> |
| CRP, mg/L                                                 | -0.118                                   | 0.4               | 0.117                                    | 0.1           | -0.051                                   | 0.5               |
| <b>Markers of kidney injury (n=38 plasma; n=37 urine)</b> |                                          |                   |                                          |               |                                          |                   |
| Plasma TNFR-1, per ng/mL                                  | 0.627                                    | <b>&lt;0.0001</b> | -                                        | -             | -                                        | -                 |
| Plasma TNFR-2, per ng/mL                                  | 0.436                                    | <b>0.006</b>      | -                                        | -             | -                                        | -                 |
| Plasma KIM-1, per pg/mL                                   | 0.554                                    | <b>0.0003</b>     | -                                        | -             | -                                        | -                 |
| Urine Activin A, pg/mL                                    | 0.441                                    | <b>0.006</b>      | -                                        | -             | -                                        | -                 |

| Activin A correlations     | Mayo Diabetes Cohort<br>(n=46)           |              | Galway Diabetes Cohort<br>(n=160)        |         | Overall Cohort<br>(n=206)                |         |
|----------------------------|------------------------------------------|--------------|------------------------------------------|---------|------------------------------------------|---------|
|                            | Spearman's<br>Correlation<br>coefficient | p-value      | Spearman's<br>Correlation<br>coefficient | p-value | Spearman's<br>Correlation<br>coefficient | p-value |
| Urine Activin A/Creatinine | 0.480                                    | <b>0.003</b> | -                                        | -       | -                                        | -       |
| Urine MCP-1, pg/mL         | 0.214                                    | 0.2          | -                                        | -       | -                                        | -       |
| Urine MCP-1/Creatinine     | 0.339                                    | <b>0.04</b>  | -                                        | -       | -                                        | -       |

BMI: body mass index; BUN: blood urea nitrogen; CRP: C-reactive protein; eGFR: estimated glomerular filtration rate; eGFR Units: CKD-EPI eGFR (mL/min/1.73m<sup>2</sup>), MDRD: Modification of Diet Renal Disease (mL/min/1.73m<sup>2</sup>); Cystatin C (mL/min/BSA); PTH: parathyroid hormone; UACR: urine albumin-creatinine ratio: random sample (Mayo diabetes cohort n=42; Galway n=160); TNFR: tumor necrosis factor receptor; KIM-1: kidney injury marker-1; MCP: monocyte chemoattractant protein-1. NGSP Hb A<sub>1c</sub> converter <http://www.ngsp.org/convert1.asp> may be used to calculate Hb A<sub>1c</sub> values from % to mmol/mol.

**Supplemental Table 2. Demographic characteristics and clinical laboratory tests by eGFR groups in combined cohorts with diabetes**

| <i>Characteristic</i>                                | <b>Overall Diabetes Cohorts</b> |                             |                             |                              |                         | p-value          |
|------------------------------------------------------|---------------------------------|-----------------------------|-----------------------------|------------------------------|-------------------------|------------------|
|                                                      | <b>eGFR ≥60</b><br>(n=92)       | <b>eGFR 45-59</b><br>(n=27) | <b>eGFR 30-44</b><br>(n=53) | <b>eGFR &lt;30</b><br>(n=34) | <b>Total</b><br>(n=206) |                  |
| <b>Activin A, pg/mL</b>                              | 326.2 (120.83)                  | 412.4 (148.14)              | 447.3 (161.11)              | 626.1 (185.05)               | 418.1 (180.43)          | <b>&lt;.0001</b> |
| <b>Estimated GFR calculation</b>                     |                                 |                             |                             |                              |                         |                  |
| CKD-EPI eGFR, ml/min/1.73m <sup>2</sup>              | 85.8 (15.45)                    | 52.3 (3.67)                 | 36.2 (3.87)                 | 22.6 (4.90)                  | 58.2 (28.22)            | <b>&lt;.0001</b> |
| <b>Clinical features and laboratory measurements</b> |                                 |                             |                             |                              |                         |                  |
| Age, years                                           | 61.3 (10.92)                    | 67.1 (7.05)                 | 71.4 (11.55)                | 70.2 (10.31)                 | 66.2 (11.43)            | <b>&lt;.0001</b> |
| Female sex, %                                        | 25 (27.2%)                      | 5 (18.5%)                   | 18 (34.0%)                  | 12 (35.3%)                   | 60 (29.1%)              | 0.4              |
| White race/ Irish ethnicity, %                       | 87 (94.6%)                      | 25 (92.6%)                  | 52 (98.1%)                  | 29 (85.3%)                   | 193 (93.7%)             | 0.1              |
| BMI, kg/m <sup>2</sup>                               | 31.8 (5.83)                     | 31.7 (5.77)                 | 31.5 (6.05)                 | 32.8 (5.31)                  | 31.9 (5.77)             | 0.6              |
| Hemoglobin, g/L                                      | 139.14 (13.60)                  | 132.11 (13.01)              | 126.00 (18.51)              | 122.24 (16.29)               | 131.98 (16.79)          | <b>&lt;.0001</b> |
| Hemoglobin A <sub>1c</sub> , %                       | 7.7 (1.47)                      | 7.5 (1.17)                  | 7.7 (1.29)                  | 8.1 (1.55)                   | 7.7 (1.40)              | 0.4              |
| Albumin, g/dL                                        | 4.5 (0.29)                      | 4.5 (0.30)                  | 4.3 (0.32)                  | 4.2 (0.31)                   | 4.4 (0.33)              | <b>&lt;.0001</b> |
| Creatinine, mg/dL                                    | 0.9 (0.20)                      | 1.3 (0.13)                  | 1.7 (0.25)                  | 2.7 (0.71)                   | 1.5 (0.72)              | <b>&lt;.0001</b> |
| BUN, mg/dL                                           | 16.6 (5.41)                     | 23.7 (5.43)                 | 32.8 (9.99)                 | 46.9 (15.84)                 | 26.7 (14.39)            | <b>&lt;.0001</b> |
| PTH, pg/mL                                           | 31.6 (14.64)                    | 50.4 (28.06)                | 72.6 (49.85)                | 107.7 (59.72)                | 57.2 (46.74)            | <b>&lt;.0001</b> |
| UACR, mg/g                                           | 130.6 (429.96)                  | 153.0 (354.60)              | 333.0 (727.30)              | 1076.3 (1402.47)             | 341.0 (813.03)          | <b>&lt;.0001</b> |
| Log UACR                                             | 2.9 (1.71)                      | 3.2 (1.91)                  | 4.2 (1.88)                  | 5.6 (2.22)                   | 3.7 (2.10)              | <b>&lt;.0001</b> |

BMI: body mass index; BUN: blood urea nitrogen; eGFR: estimated glomerular filtration rate by CKD-EPI equation; PTH: parathyroid hormone; UACR: albumin-creatinine ratio (number per eGFR group; n=91, 25, 53, 33, 202); CRP: C-reactive protein. Values represent mean (standard deviation) or number (%). NGSP Hb A<sub>1c</sub> converter <http://www.ngsp.org/convert1.asp> may be used to calculate Hb A<sub>1c</sub> values from % to mmol/mol.

**Supplemental Table 3. Demographic characteristics and clinical laboratory tests by tertiles of activin A among cohorts with diabetes**

| Activin A                               | Mayo Diabetes Cohort (N=46) |                       |                     |                               | Galway Diabetes Cohort (N=160) |                       |                     |                                 |
|-----------------------------------------|-----------------------------|-----------------------|---------------------|-------------------------------|--------------------------------|-----------------------|---------------------|---------------------------------|
|                                         | Low Tertile (N=15)          | Medium Tertile (N=15) | High Tertile (N=16) | P-value trend for Mayo cohort | Low Tertile (N=53)             | Medium Tertile (N=55) | High Tertile (N=52) | P-value trend for Galway cohort |
| <b>Activin A, pg/mL</b>                 | 309.3 (56.47)               | 487.7 (45.89)         | 713.7 (136.87)      | <b>&lt;.0001<sup>1</sup></b>  | 246.2 (44.64)                  | 348.3 (29.50)         | 587.5 (153.07)      | <b>&lt;.0001<sup>1</sup></b>    |
| <b>Estimated GFR calculations</b>       |                             |                       |                     |                               |                                |                       |                     |                                 |
| <b>CKD-EPI eGFR</b>                     | 54.0 (20.05)                | 37.9 (15.03)          | 32.6 (15.41)        | <b>0.005<sup>1</sup></b>      | 83.7 (22.13)                   | 61.2 (24.32)          | 44.1 (24.78)        | <b>&lt;.0001<sup>1</sup></b>    |
| <b>MDRD eGFR</b>                        | 56.2 (20.89)                | 40.0 (15.41)          | 34.2 (15.48)        | <b>0.006<sup>1</sup></b>      | 82.7 (25.07)                   | 61.8 (27.88)          | 44.2 (25.20)        | <b>&lt;.0001<sup>1</sup></b>    |
| <b>Cystatin C eGFR</b>                  | 54.4 (21.00)                | 34.1 (13.97)          | 31.1 (13.72)        | <b>0.002<sup>1</sup></b>      | -                              | -                     | -                   | -                               |
| <b>Demographics</b>                     |                             |                       |                     |                               |                                |                       |                     |                                 |
| <b>Age, years</b>                       | 67.2 (6.83)                 | 69.7 (4.98)           | 65.5 (9.14)         | 0.5 <sup>1</sup>              | 59.8 (11.35)                   | 68.0 (10.34)          | 69.6 (13.22)        | <b>&lt;.0001<sup>1</sup></b>    |
| <b>Female sex</b>                       | 4 (26.7%)                   | 4 (26.7%)             | 5 (31.3%)           | 0.9 <sup>2</sup>              | 12 (22.6%)                     | 17 (30.9%)            | 18 (34.6%)          | 0.43 <sup>2</sup>               |
| <b>White race</b>                       | 14 (93.3%)                  | 14 (93.3%)            | 11 (68.8%)          | 0.09 <sup>2</sup>             | 48(90.6%)                      | 54(98.2%)             | 52(100%)            | <b>0.03<sup>2</sup></b>         |
| <b>BMI, kg/m<sup>2</sup></b>            | 33.5 (6.67)                 | 31.7 (4.53)           | 35.6 (5.11)         | 0.1 <sup>1</sup>              | 30.1 (4.51)                    | 31.1 (5.57)           | 33.1 (6.74)         | <b>0.03<sup>1</sup></b>         |
| <b>Clinical laboratory measurements</b> |                             |                       |                     |                               |                                |                       |                     |                                 |
| <b>Hemoglobin, g/L</b>                  | 138.00 (12.26)              | 137.00 (14.41)        | 118.44 (16.24)      | <b>0.002<sup>1</sup></b>      | 140.33 (13.06)                 | 131.61 (17.54)        | 125.00 (16.09)      | <b>&lt;.0001<sup>1</sup></b>    |
| <b>HemoglobinA<sub>1c</sub>, %</b>      | 7.7 (1.13)                  | 7.4 (0.90)            | 8.1 (1.36)          | 0.5 <sup>1</sup>              | 7.8 (1.40)                     | 7.4 (1.38)            | 8.1 (1.56)          | <b>0.02<sup>1</sup></b>         |
| <b>Leukocytes, 10<sup>9</sup>/L</b>     | 6.6 (1.96)                  | 7.4 (2.37)            | 6.7 (1.93)          | 0.4 <sup>1</sup>              | 7.6 (2.34)                     | 7.7 (2.01)            | 7.9 (2.60)          | 0.9 <sup>1</sup>                |
| <b>Sodium, mmol/L</b>                   | 138.8 (2.76)                | 140.4 (2.67)          | 140.9 (3.42)        | <b>0.03<sup>1</sup></b>       | 139.0 (2.94)                   | 139.7 (2.67)          | 139.3 (2.74)        | 0.5 <sup>1</sup>                |
| <b>Potassium, mmol/L</b>                | 4.7 (0.47)                  | 4.9 (0.50)            | 4.8 (0.53)          | 0.6 <sup>1</sup>              | 4.5 (0.39)                     | 4.6 (0.53)            | 4.8 (0.45)          | <b>0.0007<sup>1</sup></b>       |
| <b>Phosphorus, mg/dL</b>                | 3.6 (0.43)                  | 3.8 (0.48)            | 3.9 (1.02)          | 0.7 <sup>1</sup>              | 3.2 (0.47)                     | 3.1 (0.57)            | 3.5 (0.62)          | <b>0.002<sup>1</sup></b>        |
| <b>Albumin, g/dL</b>                    | 4.4 (0.31)                  | 4.2 (0.26)            | 4.0 (0.31)          | <b>0.003<sup>1</sup></b>      | 4.6 (0.26)                     | 4.5 (0.22)            | 4.3 (0.35)          | <b>&lt;.0001<sup>1</sup></b>    |
| <b>BUN, mg/dL</b>                       | 23.8 (7.45)                 | 37.7 (17.01)          | 36.3 (18.94)        | <b>0.02<sup>1</sup></b>       | 16.9 (7.52)                    | 24.9 (10.59)          | 33.2 (15.58)        | <b>&lt;.0001<sup>1</sup></b>    |
| <b>Creatinine, mg/dL</b>                | 1.4 (0.44)                  | 1.9 (0.84)            | 2.3 (0.90)          | <b>0.01<sup>1</sup></b>       | 1.0 (0.31)                     | 1.3 (0.52)            | 1.8 (0.76)          | <b>&lt;.0001<sup>1</sup></b>    |
| <b>PTH, pg/mL</b>                       | 51.0 (31.71)                | 95.1 (52.57)          | 98.3 (51.22)        | <b>0.01<sup>1</sup></b>       | 31.6 (16.71)                   | 45.1 (33.54)          | 74.2 (58.36)        | <b>&lt;.0001<sup>1</sup></b>    |

| Activin A                       | Mayo Diabetes Cohort (N=46) |                       |                     |                               | Galway Diabetes Cohort (N=160) |                       |                     | P-value trend for Galway cohort |
|---------------------------------|-----------------------------|-----------------------|---------------------|-------------------------------|--------------------------------|-----------------------|---------------------|---------------------------------|
|                                 | Low Tertile (N=15)          | Medium Tertile (N=15) | High Tertile (N=16) | P-value trend for Mayo cohort | Low Tertile (N=53)             | Medium Tertile (N=55) | High Tertile (N=52) |                                 |
| <b>UACR, mg/g</b>               | 81.7<br>(176.51)            | 710.1<br>(1361.90)    | 1056.7<br>(1450.28) | <b>0.005<sup>1</sup></b>      | 40.4 (91.20)                   | 164.6<br>(471.35)     | 598.2<br>(963.70)   | <b>&lt;.0001<sup>1</sup></b>    |
| <b>Log UACR</b>                 | 2.8 (1.72)                  | 4.5 (2.31)            | 5.5 (2.26)          | <b>0.005<sup>1</sup></b>      | 2.6 (1.33)                     | 3.3 (1.80)            | 4.8 (2.15)          | <b>&lt;.0001<sup>1</sup></b>    |
| <b>CRP, mg/L</b>                | 3.7 (5.11)                  | 2.0 (4.56)            | 4.1 (8.60)          | 0.3 <sup>1</sup>              | 3.5 (4.27)                     | 4.6 (6.78)            | 3.9 (4.43)          | 0.5 <sup>1</sup>                |
| <b>Log CRP</b>                  | -3.7 (5.76)                 | -6.3 (5.03)           | -5.0 (5.67)         | 0.3 <sup>1</sup>              | 0.7 (1.01)                     | 0.9 (1.05)            | 0.9 (0.97)          | 0.5 <sup>1</sup>                |
| <b>Markers of kidney injury</b> |                             |                       |                     |                               |                                |                       |                     |                                 |
| <i>Plasma Biomarkers</i>        | 12                          | 12                    | 14                  | 38                            |                                |                       |                     |                                 |
| <b>TNFR-1, ng/mL</b>            | 1.6 (0.72)                  | 2.4 (0.83)            | 3.4 (1.45)          | <b>0.0003<sup>1</sup></b>     | -                              | -                     | -                   | -                               |
| <b>TNFR-2, ng/mL</b>            | 4.1 (1.55)                  | 5.8 (1.70)            | 5.9 (1.34)          | <b>0.009<sup>1</sup></b>      | -                              | -                     | -                   | -                               |
| <b>KIM-1, pg/mL</b>             | 0.2 (0.11)                  | 0.3 (0.31)            | 0.5 (0.57)          | <b>0.004<sup>1</sup></b>      | -                              | -                     | -                   | -                               |
| <i>Urine Biomarkers</i>         | 9                           | 14                    | 14                  | 37                            |                                |                       |                     |                                 |
| <b>Activin A, pg/mL</b>         | 0.7 (1.66)                  | 7.6 (14.68)           | 38.1 (43.40)        | 0.06 <sup>1</sup>             | -                              | -                     | -                   | -                               |
| <b>Activin A/Creatinine</b>     | 0.0 (0.01)                  | 0.1 (0.15)            | 0.6 (0.72)          | <b>0.02<sup>1</sup></b>       | -                              | -                     | -                   | -                               |
| <b>MCP-1, pg/mL</b>             | 194.2<br>(155.94)           | 149.5<br>(116.82)     | 304.0<br>(321.84)   | 0.3 <sup>1</sup>              | -                              | -                     | -                   | -                               |
| <b>MCP-1/Creatinine</b>         | 1.8 (1.28)                  | 1.8 (1.77)            | 3.9 (3.37)          | 0.1 <sup>1</sup>              | -                              | -                     | -                   | -                               |

<sup>1</sup>Kruskal-Wallis p-value; <sup>2</sup>Chi-Square p-value

BMI: body mass index; BUN: blood urea nitrogen; CRP: C-reactive protein; eGFR: estimated glomerular filtration rate; eGFR Units: CKD-EPI eGFR (mL/min/1.73m<sup>2</sup>), MDRD: Modification of Diet Renal Disease (mL/min/1.73m<sup>2</sup>); Cystatin C (mL/min/BSA); PTH: parathyroid hormone; UACR: urine albumin-creatinine ratio: random sample (Mayo diabetes cohort n=14, 12, 16); TNFR: tumor necrosis factor receptor; KIM-1: kidney injury marker-1; MCP: monocyte chemoattractant protein-1. NGSP HbA<sub>1c</sub> converter <http://www.ngsp.org/convert1.asp> may be used to calculate HbA<sub>1c</sub> values from % to mmol/mol. Values represent mean (standard deviation) or number (%).
